# Supplementary material for: Label-Free Quantitative Proteomic Analysis of Harmless and Pathogenic Strains of Infectious Microalgae, Prototheca spp
Source: Int J Mol Sci. 2016 Dec 29;18(1):59. doi: 10.3390/ijms18010059 (PMC5297694; doi:10.3390/ijms18010059)
Supplement: Supplementary file 1 [file ijms-18-00059-s001.xlsx]

## Sheet: Identified proteins-list
Supplementary Table 1: List of identified proteins- S.No-number assigned alphabeticcaly to entry; Entry refers to the accession number at Uniprot database; Entry name refers to entry name of Uniprot database; Gene names (ORF) and proteins names as derived from Uniprot datbase; Label free quantification is the output of Perseus software: t-test difference coloded with red to indicate significantly…
S.No	Entry	Entry name	Gene names (ORF )	Protein names	Lable free quantification												Major Protein IDs	Biophysical parameters (predicted)			GRAVY score	COG classification		VaxiJen v2.0 server prediction
					SAG2021(GT2) vs SAG2063(GT1)				SAG2064(GT3) vs SAG2063(GT1)				SAG2021(GT2) vs SAG2064(GT3)
					t-test Difference	p-value	t-test Significant	FDR	t-test Difference	p-value	t-test Significant	FDR	t-test Difference	p-value	t-test Significant	FDR		pI	MW (Da)	length (aminoacids)		Code	Name	Overall Antigen Prediction score	Prediction/result
I. CELLULAR PROCESSES AND SIGNALING
[D] Cell cycle control, cell division, chromosome partitioning
153	E1ZCB2	E1ZCB2_CHLVA	CHLNCDRAFT_144270	Putative uncharacterized protein	0	1			0.819633	0.340893			-0.819633	0.389283			E1ZCB2	6.64	105.752	986	-0.699594	D	Cell cycle control, cell division, chromosome partitioning	0.7008	ANTIGEN
[M] Cell wall/membrane/envelope biogenesis
107	A0A087SQ93	A0A087SQ93_AUXPR	F751_5935	UDP-glucose 4-epimerase 5	0.628455	0.296665			0	1			0.628455	0.296665			A0A087SQ93	6.79	38.651	350	-0.328571	M	Cell wall/membrane/envelope biogenesis	0.3905	NON-ANTIGEN
131	E1Z2C9	E1Z2C9_CHLVA	CHLNCDRAFT_133102	Putative uncharacterized protein	0.374871	0.296665			0	1			0.374871	0.296665			E1Z2C9;A0A087SLR1	5.5	40.35	368	0.0233696	M	Cell wall/membrane/envelope biogenesis	0.5915	ANTIGEN
[O] Post-translational modification, protein turnover, and chaperones
6	A0A087SAK4	A0A087SAK4_AUXPR	F751_2949	Chaperone protein ClpB1	-0.80231	0.494073			1.95306	0.0343292	+		-2.75537	0.00380228	+	+	A0A087SAK4;E1Z691	5.04	90.058	830	-0.223373	O	Post-translational modification, protein turnover, and chaperones	0.5157	ANTIGEN
19	A0A087SCD8	A0A087SCD8_AUXPR	F751_1088	Protein MPE1	0.478922	0.296665			0	1			0.478922	0.296665			A0A087SCD8	4.7	36.17	347	-0.286744	O	Post-translational modification, protein turnover, and chaperones	0.547	ANTIGEN
20	A0A087SCQ5	A0A087SCQ5_AUXPR	F751_4391	Putative AAA domain-containing protein C16E9.10c	0.439602	0.296665			0	1			0.439602	0.296665			A0A087SCQ5	5.27	64.335	615	-0.00325203	O	Post-translational modification, protein turnover, and chaperones	0.3994	NON-ANTIGEN
24	A0A087SCT8	A0A087SCT8_AUXPR	F751_4424	Proteasome subunit alpha type (EC 3.4.25.1)	0.432455	0.296665			0	1			0.432455	0.296665			A0A087SCT8;E1ZQQ9	5.13	23.167	212	-0.189623	O	Post-translational modification, protein turnover, and chaperones	0.4499	NON-ANTIGEN
28	A0A087SDF8	A0A087SDF8_AUXPR	F751_5819	26S protease regulatory subunit 6A-like protein	0.563737	0.296665			0	1			0.563737	0.296665			A0A087SDF8	4.78	47.795	429	-0.47669	O	Post-translational modification, protein turnover, and chaperones	0.4889	NON-ANTIGEN
46	A0A087SFZ9	A0A087SFZ9_AUXPR	F751_2370	14-3-3-like protein (Fragment)	0.692463	0.296665			0.642951	0.340893			0.0495119	0.959426			A0A087SFZ9	5.3	10.869	93	-0.815054	O	Post-translational modification, protein turnover, and chaperones	0.4635	NON-ANTIGEN
49	A0A087SG56	A0A087SG56_AUXPR	F751_2428	RuBisCO large subunit-binding protein subunit beta, chloroplastic	0.307801	0.296665			0	1			0.307801	0.296665			A0A087SG56;E1ZRQ6	4.5	55.271	529	0.063327	O	Post-translational modification, protein turnover, and chaperones	0.5548	ANTIGEN
62	A0A087SIQ1	A0A087SIQ1_AUXPR	F751_2447	Heat shock protein 90-2	0.929332	0.696413			2.80927	0.121777			-1.87993	0.211263			A0A087SIQ1;E1ZBE1	4.52	48.046	432	-0.371296	O	Post-translational modification, protein turnover, and chaperones	0.5869	ANTIGEN
68	A0A087SJ70	A0A087SJ70_AUXPR	F751_2616	Heat shock cognate 70 kDa protein	0	1			2.2709	0.145426			-2.2709	0.186997			A0A087SJ70	5.73	131.852	1234	-0.177066	O	Post-translational modification, protein turnover, and chaperones	0.5183	ANTIGEN
76	A0A087SK35	A0A087SK35_AUXPR	F751_6240	Prohibitin-1	0.500292	0.296665			0	1			0.500292	0.296665			A0A087SK35;E1Z4J0	9.87	30.885	284	-0.134155	O	Post-translational modification, protein turnover, and chaperones	0.3188	NON-ANTIGEN
77	A0A087SK64	A0A087SK64_AUXPR	F751_6269	T-complex protein 1 subunit beta	0.340746	0.660736			-0.691598	0.14572			1.03234	0.105426			A0A087SK64;E1ZFE4	5.55	58.796	547	-0.0661792	O	Post-translational modification, protein turnover, and chaperones	0.4587	NON-ANTIGEN
85	A0A087SL52	A0A087SL52_AUXPR	F751_2674	Peroxiredoxin-2	1.55245	0.296665			0	1			1.55245	0.296665			A0A087SL52	4.75	21.749	197	-0.0670051	O	Post-translational modification, protein turnover, and chaperones	0.4896	NON-ANTIGEN
92	A0A087SND2	A0A087SND2_AUXPR	F751_4506	Heat shock 70 kDa protein, mitochondrial	-0.111065	0.4291			0.632054	0.000583184	+	+	-0.743119	3.04819e-05	+	+	A0A087SND2	5.21	71.114	666	-0.261111	O	Post-translational modification, protein turnover, and chaperones	0.4733	NON-ANTIGEN
95	A0A087SNN6	A0A087SNN6_AUXPR	F751_4610	Stress-induced-phosphoprotein 1	0	1			3.653	0.000563327	+	+	-3.653	0.00150245	+	+	A0A087SNN6	5.63	57.12	519	-0.552987	O	Post-translational modification, protein turnover, and chaperones	0.4915	NON-ANTIGEN
99	A0A087SP16	A0A087SP16_AUXPR	F751_6051	FK506-binding protein 1	-1.3597	0.00103704	+	+	-0.088404	0.770117			-1.27129	0.000124447	+	+	A0A087SP16	8.44	67.261	627	0.0610845	O	Post-translational modification, protein turnover, and chaperones	0.4082	NON-ANTIGEN
110	A0A087SQR3	A0A087SQR3_AUXPR	F751_5178	Chaperonin CPN60, mitochondrial	0.230693	0.041275	+		0.945913	1.96391e-06	+	+	-0.715221	6.08713e-06	+	+	A0A087SQR3	5.37	60.675	580	-0.0115517	O	Post-translational modification, protein turnover, and chaperones	0.4686	NON-ANTIGEN
127	A0A087STK0	A0A087STK0_AUXPR	F751_6573	Peptidyl-prolyl cis-trans isomerase (PPIase) (EC 5.2.1.8)	1.0886	0.296665			0	1			1.0886	0.296665			A0A087STK0	8.97	18.04	172	-0.144186	O	Post-translational modification, protein turnover, and chaperones	0.62	ANTIGEN
130	A0A087STZ0	A0A087STZ0_AUXPR	F751_3275	Luminal-binding protein 5	0.695978	0.296665			0	1			0.695978	0.296665			A0A087STZ0	4.82	71.76	660	-0.411818	O	Post-translational modification, protein turnover, and chaperones	0.5565	ANTIGEN
141	E1Z5R3	E1Z5R3_CHLVA	CHLNCDRAFT_140589	Putative uncharacterized protein	-1.57411	0.10055			-5.34283	2.09848e-13	+	+	3.76872	0.00166864	+	+	E1Z5R3;A0A087ST05	4.74	92.568	841	-0.370868	O	Post-translational modification, protein turnover, and chaperones	0.3567	NON-ANTIGEN
143	E1Z7R4	E1Z7R4_CHLVA	CHLNCDRAFT_56032	Heat shock protein 70	5.34604	0.00168668	+	+	2.21216	0.144957			3.13388	0.145154			E1Z7R4	5.24	71.023	649	-0.42188	O	Post-translational modification, protein turnover, and chaperones	0.4358	NON-ANTIGEN
149	E1Z9V3	E1Z9V3_CHLVA	CHLNCDRAFT_30487	T-complex protein 1 subunit gamma	-0.263437	0.389283			-0.263437	0.340893			0	1			E1Z9V3	5.82	61.368	561	-0.209982	O	Post-translational modification, protein turnover, and chaperones	0.4099	NON-ANTIGEN
150	E1Z9W4	E1Z9W4_CHLVA	CHLNCDRAFT_21275	Putative uncharacterized protein	0.572695	0.296665			0	1			0.572695	0.296665			E1Z9W4;A0A087SD65	9.95	30.933	277	-0.180505	O	Post-translational modification, protein turnover, and chaperones	0.3496	NON-ANTIGEN
154	E1ZCI5	E1ZCI5_CHLVA	CHLNCDRAFT_51922	Putative uncharacterized protein	0.476294	0.00485355	+	+	0.735728	4.5611e-05	+	+	-0.259434	0.0338563	+		E1ZCI5	5.07	52.501	496	-0.117339	O	Post-translational modification, protein turnover, and chaperones	0.5139	ANTIGEN
158	E1ZE03	E1ZE03_CHLVA	CHLNCDRAFT_145242	Heat shock protein 70B	0.876377	0.296665			0	1			0.876377	0.296665			E1ZE03	4.89	72.081	676	-0.322485	O	Post-translational modification, protein turnover, and chaperones	0.5005	ANTIGEN
167	E1ZG17	E1ZG17_CHLVA	CHLNCDRAFT_23497	Putative uncharacterized protein (Fragment)	1.15979	0.296665			0	1			1.15979	0.296665			E1ZG17	4.76	20.821	189	-0.122751	O	Post-translational modification, protein turnover, and chaperones	0.6555	ANTIGEN
179	E1ZIV3	E1ZIV3_CHLVA	CHLNCDRAFT_31785	Putative uncharacterized protein	0.137181	0.305151			0.0624123	0.569107			0.0747684	0.429368			E1ZIV3	4.67	29.404	258	-0.491473	O	Post-translational modification, protein turnover, and chaperones	0.4958	NON-ANTIGEN
189	E1ZL13	E1ZL13_CHLVA	CHLNCDRAFT_25653	Proteasome subunit beta type (EC 3.4.25.1)	0.329527	0.296665			0	1			0.329527	0.296665			E1ZL13	6.51	25.502	225	-0.342667	O	Post-translational modification, protein turnover, and chaperones	0.4081	NON-ANTIGEN
192	E1ZLG3	E1ZLG3_CHLVA	CHLNCDRAFT_137194	Putative uncharacterized protein	3.03123	0.0238848	+		2.52776	0.0494318	+		0.50347	0.770816			E1ZLG3;A0A087SR78	5.59	103.686	946	-0.284672	O	Post-translational modification, protein turnover, and chaperones	0.4017	NON-ANTIGEN
193	E1ZMD2	E1ZMD2_CHLVA	CHLNCDRAFT_36653	Putative uncharacterized protein	0	1			2.37667	0.0101981	+	+	-2.37667	0.0188949	+		E1ZMD2	5.31	71.869	668	-0.316766	O	Post-translational modification, protein turnover, and chaperones	0.4803	NON-ANTIGEN
195	E1ZN67	E1ZN67_CHLVA	CHLNCDRAFT_26444	Proteasome subunit alpha type (EC 3.4.25.1)	0.311433	0.296665			0	1			0.311433	0.296665			E1ZN67	4.42	26.337	240	-0.225833	O	Post-translational modification, protein turnover, and chaperones	0.5025	ANTIGEN
206	E1ZQV2	E1ZQV2_CHLVA	CHLNCDRAFT_32920	Heat shock protein 70	-0.981703	4.23921e-06	+	+	-0.391374	0.0037329	+	+	-0.590329	7.36845e-05	+	+	E1ZQV2;E1ZU40;E1ZD71	4.95	70.743	645	-0.410233	O	Post-translational modification, protein turnover, and chaperones	0.4116	NON-ANTIGEN
212	E1ZRI2	E1ZRI2_CHLVA	CHLNCDRAFT_140066	Putative uncharacterized protein	0.462094	0.296665			0	1			0.462094	0.296665			E1ZRI2;A0A087SE64	4.97	62.924	574	-0.431882	O	Post-translational modification, protein turnover, and chaperones	0.7008	ANTIGEN
213	E1ZRV3	E1ZRV3_CHLVA	CHLNCDRAFT_59237	Putative uncharacterized protein	0.670812	0.685294			4.30134	0.00113899	+	+	-3.63053	0.0149349	+		E1ZRV3;A0A087SRM9	4.73	57.589	539	-0.117625	O	Post-translational modification, protein turnover, and chaperones	0.3852	NON-ANTIGEN
224	E1ZTT3	E1ZTT3_CHLVA	CHLNCDRAFT_142512	Putative uncharacterized protein	0.497741	0.296665			0	1			0.497741	0.296665			E1ZTT3;A0A087SD84	10	38.407	359	0.00445682	O	Post-translational modification, protein turnover, and chaperones	0.5634	ANTIGEN
[T] Signal transduction mechanisms
114	A0A087SRF1	A0A087SRF1_AUXPR	F751_3815	Developmentally-regulated GTP-binding protein 1	0	1			0	1			0	1			A0A087SRF1;E1ZPL7	8.93	40.964	368	-0.179348	T	Signal transduction mechanisms	0.3311	NON-ANTIGEN
157	E1ZDM9	E1ZDM9_CHLVA	CHLNCDRAFT_31033	Putative uncharacterized protein RACK1	0	1			0.604623	0.340893			-0.604623	0.389283			E1ZDM9	7.42	35.097	319	-0.215361	T	Signal transduction mechanisms	0.456	NON-ANTIGEN
210	E1ZRD1	E1ZRD1_CHLVA	CHLNCDRAFT_140000	Expressed protein	-1.11531	0.389283			-1.11531	0.340893			0	1			E1ZRD1	4.67	38.261	356	-0.547472	T	Signal transduction mechanisms	0.7695	ANTIGEN
215	E1ZSB3	E1ZSB3_CHLVA	CHLNCDRAFT_59820	Putative uncharacterized protein	0.751995	0.296665			0	1			0.751995	0.296665			E1ZSB3	3.87	16.707	149	-0.577181	T	Signal transduction mechanisms	0.4212	NON-ANTIGEN
[U] Intracellular trafficking, secretion, and vesicular transport
10	A0A087SB59	A0A087SB59_AUXPR	F751_0321	Vacuolar protein sorting-associated protein 26B	0	1			0.79539	0.340893			-0.79539	0.389283			A0A087SB59	6.8	37.732	342	-0.266374	U	Intracellular trafficking, secretion, and vesicular transport	0.5738	ANTIGEN
11	A0A087SBA5	A0A087SBA5_AUXPR	F751_0367	GTP-binding protein YPTC1	-0.300266	0.163287			-0.189521	0.35527			-0.110745	0.336125			A0A087SBA5	5.11	22.574	203	-0.27734	U	Intracellular trafficking, secretion, and vesicular transport	0.3389	NON-ANTIGEN
26	A0A087SD51	A0A087SD51_AUXPR	F751_2914	AP-4 complex subunit epsilon	0.623458	0.296665			0	1			0.623458	0.296665			A0A087SD51	5.84	68.725	663	0.0260935	U	Intracellular trafficking, secretion, and vesicular transport	0.4441	NON-ANTIGEN
60	A0A087SI84	A0A087SI84_AUXPR	F751_5979	GTP-binding nuclear protein	-0.571158	0.02621	+		0.43697	0.0600711			-1.00813	0.00124491	+	+	A0A087SI84;E1ZJ35	7.53	25.259	221	-0.531222	U	Intracellular trafficking, secretion, and vesicular transport	0.454	NON-ANTIGEN
164	E1ZFR8	E1ZFR8_CHLVA	CHLNCDRAFT_134321	Putative uncharacterized protein	0.298832	0.296665			0	1			0.298832	0.296665			E1ZFR8	5.28	156.752	1489	-0.467696	U	Intracellular trafficking, secretion, and vesicular transport	0.6313	ANTIGEN
190	E1ZL24	E1ZL24_CHLVA	CHLNCDRAFT_49011	Putative uncharacterized protein	-4.56125	1.42474e-10	+	+	-4.56125	7.90225e-12	+	+	0	1			E1ZL24	6.95	20.894	183	-0.24153	U	Intracellular trafficking, secretion, and vesicular transport	0.2848	NON-ANTIGEN
197	E1ZNZ1	E1ZNZ1_CHLVA	CHLNCDRAFT_36840	GTP binding protein	0.346812	0.296665			0	1			0.346812	0.296665			E1ZNZ1;A0A087SQ71	8.17	23.174	211	-0.049763	U	Intracellular trafficking, secretion, and vesicular transport	0.473	NON-ANTIGEN
202	E1ZQ30	E1ZQ30_CHLVA	CHLNCDRAFT_139348	Putative uncharacterized protein	0.630881	0.296665			0	1			0.630881	0.296665			E1ZQ30	4.8	129.693	1236	0.173463	U	Intracellular trafficking, secretion, and vesicular transport	0.4656	NON-ANTIGEN
222	E1ZTE2	E1ZTE2_CHLVA	CHLNCDRAFT_33302	Putative uncharacterized protein	-0.641982	0.389283			-0.641982	0.340893			0	1			E1ZTE2;A0A087SPK2	6.29	23.935	217	-0.289401	U	Intracellular trafficking, secretion, and vesicular transport	0.4055	NON-ANTIGEN
[V] Defense mechanisms
198	E1ZP22	E1ZP22_CHLVA	CHLNCDRAFT_138968	Putative uncharacterized protein	-0.962047	0.389283			-0.962047	0.340893			0	1			E1ZP22	10.53	62.547	562	-0.526157	V	Defense mechanisms	0.5755	ANTIGEN
[Z] Cytoskeleton
61	A0A087SIG1	A0A087SIG1_AUXPR	F751_0542	Tubulin alpha chain	-1.66082	0.233533			-0.751714	0.522095			-0.909109	0.539245			A0A087SIG1	4.49	43.326	394	-0.111421	Z	Cytoskeleton	0.4631	NON-ANTIGEN
124	A0A087SSM0	A0A087SSM0_AUXPR	F751_3554	Actin	-0.561702	0.000196828	+	+	0.113352	0.48795			-0.675054	0.00243962	+	+	A0A087SSM0	5.29	43.032	390	-0.17641	Z	Cytoskeleton	0.4922	NON-ANTIGEN
138	E1Z4E5	E1Z4E5_CHLVA	CHLNCDRAFT_33793	Alpha-tubulin	1.05421	0.296665			0	1			1.05421	0.296665			E1Z4E5	4.68	49.643	450	-0.182667	Z	Cytoskeleton	0.4178	NON-ANTIGEN
183	E1ZJM1	E1ZJM1_CHLVA	CHLNCDRAFT_48975	Tubulin beta chain	0.0174557	0.888955			-0.569372	0.000579146	+	+	0.586827	0.000400553	+	+	E1ZJM1;A0A087SA88;A0A087SEY3	4.53	48.736	436	-0.298394	Z	Cytoskeleton	0.5082	ANTIGEN
INFORMATION STORAGE AND PROCESSING
[A] RNA processing and modification
63	A0A087SIW1	A0A087SIW1_AUXPR	F751_2507	Putative ATP-dependent RNA helicase DHX35	-0.329967	0.389283			-0.329967	0.340893			0	1			A0A087SIW1	7.62	139.947	1279	-0.0810008	A	RNA processing and modification	0.4802	NON-ANTIGEN
69	A0A087SJF8	A0A087SJF8_AUXPR	F751_1476	DEAD-box ATP-dependent RNA helicase 52B	0.404407	0.031321	+		-0.946273	0.236063			1.35068	0.142489			A0A087SJF8;E1ZJL1	4.96	105.026	957	-0.332497	A	RNA processing and modification	0.5029	ANTIGEN
75	A0A087SJY2	A0A087SJY2_AUXPR	F751_3674	U4/U6 small nuclear ribonucleoprotein Prp3	0	1			0	1			0	1			A0A087SJY2	10.08	46.852	426	-0.75493	A	RNA processing and modification	0.6023	ANTIGEN
83	A0A087SL20	A0A087SL20_AUXPR	F751_2641	Putative nucleolar protein 5-2	0.64692	0.296665			0	1			0.64692	0.296665			A0A087SL20;E1Z8A5	8.87	53.497	496	-0.197379	A	RNA processing and modification	0.4816	NON-ANTIGEN
112	A0A087SR65	A0A087SR65_AUXPR	F751_6986	DEAD-box ATP-dependent RNA helicase 20	-5.40415e-06	0.389283			-5.40415e-06	0.340893			0	1			A0A087SR65	6.8	83.673	746	-0.266488	A	RNA processing and modification	0.4461	NON-ANTIGEN
121	A0A087SSC1	A0A087SSC1_AUXPR	F751_6384	Nucleolar protein 56	0.235064	0.13679			-1.2582	0.134739			1.49326	0.117306			A0A087SSC1;E1ZDR7	8.63	51.35	469	-0.235181	AJ	RNA processing and modification, Translation, ribosomal structure and biogenesis	0.5115	ANTIGEN
[B] Chromatin structure and dynamics
5	A0A087S9W3	A0A087S9W3_AUXPR	F751_0181	Histone H4 (Fragment)	0	1			2.9089	0.010575	+	+	-2.9089	0.0194995	+		A0A087S9W3;E1ZGZ4;E1ZFV0;A0A087S9X0	12.01	11.136	100	-0.557	B	Chromatin structure and dynamics	0.5828	ANTIGEN
53	A0A087SHK0	A0A087SHK0_AUXPR	F751_6159	Histone H2B	0.723888	0.296665			0	1			0.723888	0.296665			A0A087SHK0;E1Z2X4;E1ZRA4;E1ZRC5;E1ZRB8;E1ZSZ3;E1ZGZ6;A0A087SIN3	11.02	13.262	123	-0.27561	B	Chromatin structure and dynamics	0.4383	NON-ANTIGEN
122	A0A087SSE1	A0A087SSE1_AUXPR	F751_0802	Histone H3.1	1.25272	0.226342			0.0141586	0.991058			1.23856	0.231694			A0A087SSE1;A0A087S9H0;A0A087S9Z5;E1ZGZ5;A0A087SHK1;A0A087S9W9;E1ZRB7;E1ZRA5;E1ZSZ5;E1ZCE3;A0A087SIU2;E1Z2X3;E1ZR66;E1ZFV1;A0A087S9X1;E1ZRC8;E1Z345;A0A087SS41;A0A087SDR2	11.18	25.722	236	-0.401271	B	Chromatin structure and dynamics	0.7839	ANTIGEN
219	E1ZT43	E1ZT43_CHLVA	CHLNCDRAFT_37593	Histone H2B	0.521034	0.296665			0	1			0.521034	0.296665			E1ZT43;A0A087SME4	10.89	13.452	122	-0.479508	B	Chromatin structure and dynamics	0.4996	NON-ANTIGEN
[J] Translation, ribosomal structure and biogenesis
3	A0A087S9N3	A0A087S9N3_AUXPR	F751_0120	40S ribosomal protein S23-2	1.02989	0.296665			0	1			1.02989	0.296665			A0A087S9N3;E1ZCL3	11.21	18.39	164	-0.494512	J	Translation, ribosomal structure and biogenesis	0.662	ANTIGEN
9	A0A087SAX8	A0A087SAX8_AUXPR	F751_5591	60S ribosomal protein L13	0.791286	0.296665			0	1			0.791286	0.296665			A0A087SAX8	12.07	23.316	208	-0.653846	J	Translation, ribosomal structure and biogenesis	0.743	ANTIGEN
32	A0A087SE71	A0A087SE71_AUXPR	F751_0209	Elongation factor Tu	-1.49561	0.194151			-4.33138	1.67519e-10	+	+	2.83577	0.0243501	+		A0A087SE71;E1Z696	6.28	48.336	447	-0.140045	J	Translation, ribosomal structure and biogenesis	0.5531	ANTIGEN
35	A0A087SET3	A0A087SET3_AUXPR	F751_5079	60S ribosomal protein L11-1	1.37834	0.296665			0	1			1.37834	0.296665			A0A087SET3	10.46	20.556	180	-0.459444	J	Translation, ribosomal structure and biogenesis	0.5033	ANTIGEN
36	A0A087SEX4	A0A087SEX4_AUXPR	F751_5120	40S ribosomal protein S8	0.513165	0.296665			0	1			0.513165	0.296665			A0A087SEX4	11.16	21.974	191	-0.936649	J	Translation, ribosomal structure and biogenesis	0.6093	ANTIGEN
50	A0A087SG86	A0A087SG86_AUXPR	F751_3752	60S ribosomal protein L30	1.60056	0.109105			-1.59333	0.266474			3.19389	0.0266192	+		A0A087SG86	4.96	22.02	203	0.0615764	J	Translation, ribosomal structure and biogenesis	0.5073	ANTIGEN
51	A0A087SG87	A0A087SG87_AUXPR	F751_3753	40S ribosomal protein S25	1.12312	0.296665			0	1			1.12312	0.296665			A0A087SG87	10.91	13.482	122	-0.686885	J	Translation, ribosomal structure and biogenesis	0.6778	ANTIGEN
52	A0A087SG91	A0A087SG91_AUXPR	F751_3757	40S ribosomal protein S3-3	0.606269	0.296665			0	1			0.606269	0.296665			A0A087SG91;E1ZQW2	10.12	24.109	219	-0.03379	J	Translation, ribosomal structure and biogenesis	0.5853	ANTIGEN
54	A0A087SHR1	A0A087SHR1_AUXPR	F751_3945	Elongation factor 2	0.607043	0.021474	+		-0.00829156	0.972023			0.615335	0.0237899	+		A0A087SHR1;E1ZDH1	6.62	120.395	1092	-0.165201	J	Translation, ribosomal structure and biogenesis	0.4619	NON-ANTIGEN
55	A0A087SHS8	A0A087SHS8_AUXPR	F751_3962	Eukaryotic initiation factor 4A-10	0.420024	0.000138845	+	+	-0.189701	0.0819683			0.609726	9.17447e-05	+	+	A0A087SHS8;E1ZM95;E1Z284	5.52	44.073	389	-0.21491	J	Translation, ribosomal structure and biogenesis	0.4395	NON-ANTIGEN
66	A0A087SJ28	A0A087SJ28_AUXPR	F751_2574	40S ribosomal protein S17	0.912166	0.296665			0	1			0.912166	0.296665			A0A087SJ28;E1Z7P0	10.74	15.377	134	-0.618657	J	Translation, ribosomal structure and biogenesis	0.6397	ANTIGEN
70	A0A087SJM7	A0A087SJM7_AUXPR	F751_4183	40S ribosomal protein S10	6.87426	4.59927e-15	+	+	0	1			6.87426	4.59927e-15	+	+	A0A087SJM7	9.99	19.465	172	-0.886628	J	Translation, ribosomal structure and biogenesis	0.7115	ANTIGEN
71	A0A087SJR8	A0A087SJR8_AUXPR	F751_3610	60S ribosomal protein L34	0	1			0.602743	0.340893			-0.602743	0.389283			A0A087SJR8;E1Z8C6	12.14	14.622	129	-0.755814	J	Translation, ribosomal structure and biogenesis	0.5197	ANTIGEN
73	A0A087SJW6	A0A087SJW6_AUXPR	F751_3658	60S ribosomal protein L24-2	0.59345	0.296665			0	1			0.59345	0.296665			A0A087SJW6	12.07	17.79	158	-0.886709	J	Translation, ribosomal structure and biogenesis	0.6174	ANTIGEN
78	A0A087SK74	A0A087SK74_AUXPR	F751_6279	Elongation factor 1-alpha	0.182601	0.00945623	+		-0.582708	2.75576e-05	+	+	0.765309	3.19038e-06	+	+	A0A087SK74	8.71	50.793	462	-0.254762	J	Translation, ribosomal structure and biogenesis	0.5093	ANTIGEN
80	A0A087SKF4	A0A087SKF4_AUXPR	F751_4701	40S ribosomal protein S9-1	0.724322	0.296665			0	1			0.724322	0.296665			A0A087SKF4;E1Z9Q9	10.87	22.705	192	-0.775521	J	Translation, ribosomal structure and biogenesis	0.6151	ANTIGEN
81	A0A087SKG6	A0A087SKG6_AUXPR	F751_4713	60S ribosomal protein L6	4.38647	0.00188308	+	+	0	1			4.38647	0.00188308	+	+	A0A087SKG6;E1ZAC3	11.06	23.981	220	-0.311364	J	Translation, ribosomal structure and biogenesis	0.5837	ANTIGEN
82	A0A087SKJ4	A0A087SKJ4_AUXPR	F751_4741	60S ribosomal protein L5-1	0	1			0.69556	0.340893			-0.69556	0.389283			A0A087SKJ4	9.7	32.978	293	-0.648805	J	Translation, ribosomal structure and biogenesis	0.7287	ANTIGEN
84	A0A087SL21	A0A087SL21_AUXPR	F751_2642	Ubiquitin-60S ribosomal protein L40-2	-3.69822	0.054896			-8.22485	7.96316e-14	+	+	4.52663	0.0239354	+		A0A087SL21;E1ZHZ0;E1Z5I7;E1ZCE0	10.61	14.74	128	-0.649219	J	Translation, ribosomal structure and biogenesis	0.7383	ANTIGEN
86	A0A087SLA8	A0A087SLA8_AUXPR	F751_2099	40S ribosomal protein S16	2.11735	0.0777385			-0.421258	0.340893			2.53861	0.0262863	+		A0A087SLA8;E1ZGF3	11.36	15.847	141	-0.43617	J	Translation, ribosomal structure and biogenesis	0.715	ANTIGEN
90	A0A087SN56	A0A087SN56_AUXPR	F751_4430	60S ribosomal protein L23	0.769861	0.296665			0	1			0.769861	0.296665			A0A087SN56	11.04	14.968	140	-0.161429	J	Translation, ribosomal structure and biogenesis	0.6662	ANTIGEN
93	A0A087SNJ3	A0A087SNJ3_AUXPR	F751_4567	60S ribosomal protein L10	1.19132	0.296665			0	1			1.19132	0.296665			A0A087SNJ3	9.91	71.171	687	0.0641921	J	Translation, ribosomal structure and biogenesis	0.5815	ANTIGEN
98	A0A087SNV1	A0A087SNV1_AUXPR	F751_1182	60S ribosomal protein L12-1	6.72894	1.36402e-15	+	+	0	1			6.72894	1.36402e-15	+	+	A0A087SNV1	10	16.976	157	-0.252866	J	Translation, ribosomal structure and biogenesis	0.6365	ANTIGEN
103	A0A087SPQ0	A0A087SPQ0_AUXPR	F751_5668	60S ribosomal protein L26-2	0	1			0.723633	0.340893			-0.723633	0.389283			A0A087SPQ0	11.37	16.218	144	-0.639583	J	Translation, ribosomal structure and biogenesis	0.8705	ANTIGEN
113	A0A087SR74	A0A087SR74_AUXPR	F751_6995	Ribosomal protein L15	0.861485	0.296665			0	1			0.861485	0.296665			A0A087SR74	11.13	48.995	437	0.0256293	J	Translation, ribosomal structure and biogenesis	0.5873	ANTIGEN
115	A0A087SRI4	A0A087SRI4_AUXPR	F751_3848	Eukaryotic translation initiation factor 2 subunit 3	0.538391	0.296665			0	1			0.538391	0.296665			A0A087SRI4	8.63	50.162	465	0.0496774	J	Translation, ribosomal structure and biogenesis	0.5515	ANTIGEN
140	E1Z5J4	E1Z5J4_CHLVA	CHLNCDRAFT_55999	Cytoplasmic ribosomal protein S13	1.61486	0.105677			1.09603	0.144928			0.518825	0.670679			E1Z5J4;A0A087SDS7	11.16	17.018	152	-0.574342	J	Translation, ribosomal structure and biogenesis	0.4131	NON-ANTIGEN
144	E1Z823	E1Z823_CHLVA	CHLNCDRAFT_34417	40S ribosomal protein S18	0.792296	0.296665			0	1			0.792296	0.296665			E1Z823;A0A087SIA2	10.96	17.369	153	-0.65098	J	Translation, ribosomal structure and biogenesis	0.5616	ANTIGEN
145	E1Z866	E1Z866_CHLVA	CHLNCDRAFT_59607	60S acidic ribosomal protein P0	0	1			0.587854	0.340893			-0.587854	0.389283			E1Z866	4.75	33.714	314	0.0133758	J	Translation, ribosomal structure and biogenesis	0.4118	NON-ANTIGEN
146	E1Z8N4	E1Z8N4_CHLVA	CHLNCDRAFT_59621	Putative uncharacterized protein	0.553961	0.296665			0	1			0.553961	0.296665			E1Z8N4	10.26	21.707	193	-0.200518	J	Translation, ribosomal structure and biogenesis	0.5527	ANTIGEN
147	E1Z901	E1Z901_CHLVA	CHLNCDRAFT_59623	40S ribosomal protein S15	0.435941	0.296665			0	1			0.435941	0.296665			E1Z901;A0A087SB44	10.69	14.722	130	-0.185385	J	Translation, ribosomal structure and biogenesis	0.8046	ANTIGEN
152	E1ZBK2	E1ZBK2_CHLVA	CHLNCDRAFT_30705 CHLNCDRAFT_59648	Putative uncharacterized protein	1.33443	0.296665			0	1			1.33443	0.296665			E1ZBK2	8.62	50.644	463	-0.219654	J	Translation, ribosomal structure and biogenesis	0.4829	NON-ANTIGEN
156	E1ZD41	E1ZD41_CHLVA	CHLNCDRAFT_35097	Putative uncharacterized protein	3.27822	0.0225406	+		-0.703675	0.340893			3.98189	0.00171147	+	+	E1ZD41;A0A087SNS8	10.85	43.164	386	-0.479793	J	Translation, ribosomal structure and biogenesis	0.3642	NON-ANTIGEN
169	E1ZGA3	E1ZGA3_CHLVA	CHLNCDRAFT_59674	40S ribosomal protein S27	3.34755	0.00189598	+	+	1.20218	0.14511			2.14537	0.0930021			E1ZGA3	8.71	9.462	86	-0.0267442	J	Translation, ribosomal structure and biogenesis	0.4909	NON-ANTIGEN
175	E1ZI50	E1ZI50_CHLVA	CHLNCDRAFT_135401	40S ribosomal protein S14	0.207324	0.246029			-0.0135187	0.913096			0.220843	0.157046			E1ZI50;A0A087SA15	11.37	14.133	132	-0.324242	J	Translation, ribosomal structure and biogenesis	0.5241	ANTIGEN
181	E1ZJA0	E1ZJA0_CHLVA	CHLNCDRAFT_14518	Putative uncharacterized protein (Fragment)	0.62838	0.296665			0	1			0.62838	0.296665			E1ZJA0;A0A087SNW3	10.01	13.761	120	-0.6325	J	Translation, ribosomal structure and biogenesis	0.7022	ANTIGEN
186	E1ZK88	E1ZK88_CHLVA	CHLNCDRAFT_9815	Ubiquitin (Fragment)	-1.11893	5.24608e-06	+	+	0.293313	0.0754532			-1.41225	2.18242e-05	+	+	E1ZK88	6.52	8.522	76	-0.463158	J	Translation, ribosomal structure and biogenesis	0.5121	ANTIGEN
201	E1ZQ26	E1ZQ26_CHLVA	CHLNCDRAFT_27155	Putative uncharacterized protein	-0.844803	0.389283			-0.844803	0.340893			0	1			E1ZQ26	11.72	7.607	66	-0.477273	J	Translation, ribosomal structure and biogenesis	0.9436	ANTIGEN
207	E1ZQV5	E1ZQV5_CHLVA	CHLNCDRAFT_32922	Putative uncharacterized protein	1.19977	0.296665			0	1			1.19977	0.296665			E1ZQV5	10.84	28.885	255	-0.459216	J	Translation, ribosomal structure and biogenesis	0.5604	ANTIGEN
209	E1ZQY4	E1ZQY4_CHLVA	CHLNCDRAFT_37294	40S ribosomal protein S5	3.31966	0.00171991	+	+	0	1			3.31966	0.00171991	+	+	E1ZQY4;A0A087SCT0	10.57	21.654	194	-0.326289	J	Translation, ribosomal structure and biogenesis	0.4907	NON-ANTIGEN
211	E1ZRE8	E1ZRE8_CHLVA	CHLNCDRAFT_49213	Putative uncharacterized protein	0.914144	0.296665			0	1			0.914144	0.296665			E1ZRE8	10.73	27.224	241	-0.439834	J	Translation, ribosomal structure and biogenesis	0.3243	NON-ANTIGEN
216	E1ZSM6	E1ZSM6_CHLVA	CHLNCDRAFT_37552	Putative uncharacterized protein (Fragment)	3.32361	0.00187356	+	+	1.22059	0.144939			2.10302	0.0998153			E1ZSM6;A0A087SP31	11.32	32.878	305	-0.236393	J	Translation, ribosomal structure and biogenesis	0.3509	NON-ANTIGEN
[K] Transcription
4	A0A087S9T6	A0A087S9T6_AUXPR	F751_0116	DNA-directed RNA polymerase subunit (EC 2.7.7.6) (Fragment)	1.43787	0.296665			0	1			1.43787	0.296665			A0A087S9T6	10.37	81.004	702	-0.306695	K	Transcription	0.5245	ANTIGEN
182	E1ZJG2	E1ZJG2_CHLVA	CHLNCDRAFT_135955	Putative uncharacterized protein	-0.927049	0.389283			-0.927049	0.340893			0	1			E1ZJG2	5.08	144.882	1389	-0.0694744	K	Transcription	0.6093	ANTIGEN
[L] Replication, recombination and repair
37	A0A087SEY4	A0A087SEY4_AUXPR	F751_5130	E3 ubiquitin-protein ligase SHPRH	0.498738	0.296665			0	1			0.498738	0.296665			A0A087SEY4	6.13	166.267	1560	-0.156795	L	Replication, recombination and repair	0.5347	ANTIGEN
106	A0A087SQ70	A0A087SQ70_AUXPR	F751_5439	DNA topoisomerase 1	0.911635	0.296665			0	1			0.911635	0.296665			A0A087SQ70	8.55	75.835	666	-0.71952	L	Replication, recombination and repair	0.6018	ANTIGEN
118	A0A087SS42	A0A087SS42_AUXPR	F751_0287	DNA mismatch repair protein Msh3	0	1			0	1			0	1			A0A087SS42	8.08	66.284	623	-0.00304976	L	Replication, recombination and repair	0.4714	NON-ANTIGEN
180	E1ZIY8	E1ZIY8_CHLVA	CHLNCDRAFT_135766	Putative uncharacterized protein	0.553069	0.296665			0	1			0.553069	0.296665			E1ZIY8	7.21	83.426	807	-0.570012	L	Replication, recombination and repair	0.7433	ANTIGEN
METABOLISM
[C] Energy production and conversion
13	A0A087SBN0	A0A087SBN0_AUXPR	F751_3325	ATP synthase subunit beta (EC 3.6.3.14) (EC 4.2.1.24) (Delta-aminolevulinic acid dehydratase)	-0.0104182	0.922001			0.50662	0.000187179	+	+	-0.517039	0.000191901	+	+	A0A087SBN0	5.13	151.883	1407	-0.128998	C	Energy production and conversion	0.458	NON-ANTIGEN
17	A0A087SBZ2	A0A087SBZ2_AUXPR	F751_3437	Isocitrate dehydrogenase [NAD] subunit, mitochondrial (EC 1.1.1.41)	0.452837	0.296665			0	1			0.452837	0.296665			A0A087SBZ2	7.57	40.021	370	-0.0605405	C	Energy production and conversion	0.6162	ANTIGEN
23	A0A087SCT6	A0A087SCT6_AUXPR	F751_4422	Citrate synthase	-3.5549	0.00165696	+	+	-3.5549	0.000629628	+	+	0	1			A0A087SCT6;E1ZKH5	7.24	50.799	467	-0.0648822	C	Energy production and conversion	0.3763	NON-ANTIGEN
25	A0A087SCZ0	A0A087SCZ0_AUXPR	F751_2853	Putative mitochondrial 2-oxoglutarate/malate carrier protein	0.422133	0.296665			0	1			0.422133	0.296665			A0A087SCZ0	10.16	31.735	301	0.113953	C	Energy production and conversion	0.3687	NON-ANTIGEN
33	A0A087SEA7	A0A087SEA7_AUXPR	F751_0245	Malate dehydrogenase (EC 1.1.1.37)	0	1			0.464287	0.340893			-0.464287	0.389283			A0A087SEA7;E1ZN90	5.92	34.948	330	-0.0524242	C	Energy production and conversion	0.5964	ANTIGEN
34	A0A087SER8	A0A087SER8_AUXPR	F751_5064	ADP,ATP carrier protein	1.12408	0.296665			0	1			1.12408	0.296665			A0A087SER8	10.26	120.061	1114	0.10772	C	Energy production and conversion	0.4296	NON-ANTIGEN
44	A0A087SFL9	A0A087SFL9_AUXPR	F751_3241	Putative ATP-citrate synthase	0.838933	0.296665			0	1			0.838933	0.296665			A0A087SFL9	7.49	61.813	578	-0.00726644	C	Energy production and conversion	0.6275	ANTIGEN
48	A0A087SG45	A0A087SG45_AUXPR	F751_2417	Malate dehydrogenase (EC 1.1.1.37)	0.92592	0.296665			0	1			0.92592	0.296665			A0A087SG45;E1ZRS4;A0A087SLQ1	8.16	32.707	313	0.0926518	C	Energy production and conversion	0.3454	NON-ANTIGEN
65	A0A087SIY9	A0A087SIY9_AUXPR	F751_2535	Succinyl-CoA ligase [ADP-forming] subunit alpha-1, mitochondrial	0	1			4.71846	3.77528e-14	+	+	-4.71846	1.16376e-12	+	+	A0A087SIY9;E1ZS72	7.51	33.139	321	0.115576	C	Energy production and conversion	0.4828	NON-ANTIGEN
72	A0A087SJV3	A0A087SJV3_AUXPR	F751_3645	Aldehyde dehydrogenase family 2 member B4, mitochondrial (Fragment)	0.497668	0.00383911	+	+	-0.540861	0.000345782	+	+	1.03853	4.15509e-05	+	+	A0A087SJV3	6.25	52.172	481	-0.0920998	C	Energy production and conversion	0.3949	NON-ANTIGEN
88	A0A087SN15	A0A087SN15_AUXPR	F751_1292	Dihydrolipoyllysine-residue succinyltransferase component of 2-oxoglutarate dehydrogenase complex 1, mitochondrial	0.497811	0.296665			0	1			0.497811	0.296665			A0A087SN15;E1Z629	4.84	31.447	291	0.0563574	C	Energy production and conversion	0.4563	NON-ANTIGEN
94	A0A087SNM4	A0A087SNM4_AUXPR	F751_4598	Isocitrate dehydrogenase [NADP] (EC 1.1.1.42)	2.19514	0.130237			-0.700278	0.340893			2.89542	0.0238564	+		A0A087SNM4	8.5	53.032	472	-0.350636	C	Energy production and conversion	0.5079	ANTIGEN
96	A0A087SNS4	A0A087SNS4_AUXPR	F751_1155	Putative alcohol dehydrogenase	0	1			0.564379	0.340893			-0.564379	0.389283			A0A087SNS4	6.85	47.816	460	0.137391	C	Energy production and conversion	0.3298	NON-ANTIGEN
97	A0A087SNS9	A0A087SNS9_AUXPR	F751_1160	V-type proton ATPase subunit G	0.524419	0.296665			0	1			0.524419	0.296665			A0A087SNS9	5.99	12.224	108	-1.00556	C	Energy production and conversion	0.543	ANTIGEN
105	A0A087SQ68	A0A087SQ68_AUXPR	F751_5437	Phosphate carrier protein, mitochondrial	3.06356	0.00184831	+	+	0	1			3.06356	0.00184831	+	+	A0A087SQ68	9.05	38.14	354	0.179661	C	Energy production and conversion	0.384	NON-ANTIGEN
116	A0A087SRI7	A0A087SRI7_AUXPR	F751_3851	Pyruvate dehydrogenase E1 component subunit beta-1, mitochondrial	0.575626	0.296665			0	1			0.575626	0.296665			A0A087SRI7	4.73	38.383	353	-0.0416431	C	Energy production and conversion	0.3287	NON-ANTIGEN
119	A0A087SS52	A0A087SS52_AUXPR	F751_0297	Succinyl-CoA ligase subunit beta (EC 6.2.1.-)	0.299521	0.0205926	+		-0.0616414	0.593848			0.361162	0.0167384	+		A0A087SS52;E1ZR65	4.94	44.7	419	-0.00143198	C	Energy production and conversion	0.4884	NON-ANTIGEN
120	A0A087SS91	A0A087SS91_AUXPR	F751_6354	Aconitate hydratase, mitochondrial (Aconitase) (EC 4.2.1.-)	0.633489	0.000696146	+	+	-7.32234	8.94017e-18	+	+	7.95582	1.04081e-13	+	+	A0A087SS91;E1Z6W8	5.82	85.196	796	-0.231784	C	Energy production and conversion	0.5163	ANTIGEN
128	A0A087STM2	A0A087STM2_AUXPR	F751_3693	Phosphoenolpyruvate carboxykinase [ATP] 1	0.747342	0.296665			0	1			0.747342	0.296665			A0A087STM2;E1Z2U6;E1ZND4	6.59	67.33	611	-0.323895	C	Energy production and conversion	0.4948	NON-ANTIGEN
133	E1Z2I9	E1Z2I9_CHLVA	CHLNCDRAFT_133175	Malate synthase (EC 2.3.3.9)	0	1			0.615878	0.340893			-0.615878	0.389283			E1Z2I9;A0A087SLY9	8.32	59.52	532	-0.246617	C	Energy production and conversion	0.4558	NON-ANTIGEN
168	E1ZG37	E1ZG37_CHLVA	CHLNCDRAFT_31334	Putative uncharacterized protein	0.626869	0.00237142	+	+	-3.80575	1.27651e-11	+	+	4.43262	1.36509e-12	+	+	E1ZG37	6.71	63.538	590	0.0228814	C	Energy production and conversion	0.5841	ANTIGEN
172	E1ZH03	E1ZH03_CHLVA	CHLNCDRAFT_56195	Putative uncharacterized protein	0.424899	0.296665			0	1			0.424899	0.296665			E1ZH03;A0A087SEJ0	5.94	45.225	409	-0.290709	C	Energy production and conversion	0.3929	NON-ANTIGEN
173	E1ZH40	E1ZH40_CHLVA	CHLNCDRAFT_56196	Succinate dehydrogenase [ubiquinone] flavoprotein subunit, mitochondrial (EC 1.3.5.1)	0.318169	0.296665			0	1			0.318169	0.296665			E1ZH40;A0A087SEC8	6.88	59.829	558	-0.232796	C	Energy production and conversion	0.4114	NON-ANTIGEN
176	E1ZI98	E1ZI98_CHLVA	CHLNCDRAFT_25073	Putative uncharacterized protein (Fragment)	0.870014	0.296665			0	1			0.870014	0.296665			E1ZI98	8.51	7.041	67	-0.235821	C	Energy production and conversion	0.7096	ANTIGEN
184	E1ZK10	E1ZK10_CHLVA	CHLNCDRAFT_136213	ATP/ADP translocator	0.10314	0.551549			-0.142025	0.492695			0.245165	0.249312			E1ZK10	10.35	36.587	340	0.07	C	Energy production and conversion	0.3751	NON-ANTIGEN
194	E1ZMK4	E1ZMK4_CHLVA	CHLNCDRAFT_32356	Putative uncharacterized protein	-0.289126	0.00961725	+		0.0964572	0.421668			-0.385583	0.0147671	+		E1ZMK4;A0A087SJK5	4.63	80.16	766	0.540601	C	Energy production and conversion	0.6797	ANTIGEN
196	E1ZNM5	E1ZNM5_CHLVA	CHLNCDRAFT_32475	Putative uncharacterized protein	0	1			0.503422	0.340893			-0.503422	0.389283			E1ZNM5	6.82	59.857	542	-0.209225	C	Energy production and conversion	0.5475	ANTIGEN
214	E1ZS63	E1ZS63_CHLVA	CHLNCDRAFT_141119	Putative uncharacterized protein	1.07879	0.296665			0	1			1.07879	0.296665			E1ZS63;F2YGR0	4.8	45.561	422	0.0056872	C	Energy production and conversion	0.4073	NON-ANTIGEN
218	E1ZT42	E1ZT42_CHLVA	CHLNCDRAFT_56410	V-type H+ ATPase subunit A	0.540176	0.00381154	+	+	0.422866	0.0090118	+	+	0.117311	0.203729			E1ZT42;A0A087SME3	5.1	68.079	620	-0.213871	C	Energy production and conversion	0.4096	NON-ANTIGEN
226	F2YGQ9	F2YGQ9_CHLVA	cvarcp_00050	ATP synthase subunit alpha	0.657543	0.296665			0	1			0.657543	0.296665			F2YGQ9	5.41	54.654	506	-0.0656126	C	Energy production and conversio	0.4387	NON-ANTIGEN
[E] Amino acid transport and metabolism
1	A0A087S9H4	A0A087S9H4_AUXPR	F751_0057	D-3-phosphoglycerate dehydrogenase (EC 1.1.1.95)	0.583381	0.296665			0	1			0.583381	0.296665			A0A087S9H4	9.85	66.49	634	0.118927	E	Amino acid transport and metabolism	0.4406	NON-ANTIGEN
16	A0A087SBU8	A0A087SBU8_AUXPR	F751_3393	5-methyltetrahydropteroyltriglutamate-homocysteine methyltransferase	6.42601	2.96676e-13	+	+	0	1			6.42601	2.96676e-13	+	+	A0A087SBU8	5.46	85.34	783	-0.113282	E	Amino acid transport and metabolism	0.561	ANTIGEN
22	A0A087SCS2	A0A087SCS2_AUXPR	F751_4408	Cysteine synthase (EC 2.5.1.47)	0	1			0.531873	0.340893			-0.531873	0.389283			A0A087SCS2;E1ZEF2	6.58	34.124	321	-0.035514	E	Amino acid transport and metabolism	0.4829	NON-ANTIGEN
42	A0A087SFG0	A0A087SFG0_AUXPR	F751_3182	Cysteine synthase, chloroplastic/chromoplastic	-3.88813	0.0017093	+	+	1.67146	0.0647497			-5.55959	4.27136e-12	+	+	A0A087SFG0	7.66	37.827	361	-0.0033241	E	Amino acid transport and metabolism	0.4747	NON-ANTIGEN
43	A0A087SFJ9	A0A087SFJ9_AUXPR	F751_3221	Glutamate dehydrogenase	0.756973	0.296665			0	1			0.756973	0.296665			A0A087SFJ9	4.75	50.447	465	-0.162366	E	Amino acid transport and metabolism	0.4075	NON-ANTIGEN
45	A0A087SFR4	A0A087SFR4_AUXPR	F751_2286	3-isopropylmalate dehydratase small subunit	0.852793	0.296665			0	1			0.852793	0.296665			A0A087SFR4	7.05	23.203	213	-0.222535	E	Amino acid transport and metabolism	0.6477	ANTIGEN
67	A0A087SJ38	A0A087SJ38_AUXPR	F751_2584	LL-diaminopimelate aminotransferase, chloroplastic	0.742989	0.296665			0	1			0.742989	0.296665			A0A087SJ38	5.21	47.417	433	-0.189838	E	Amino acid transport and metabolism	0.3351	NON-ANTIGEN
74	A0A087SJX6	A0A087SJX6_AUXPR	F751_3668	Argininosuccinate synthase	3.56537	0.00171202	+	+	0	1			3.56537	0.00171202	+	+	A0A087SJX6;E1ZF33	6.21	49.313	447	-0.306935	E	Amino acid transport and metabolism	0.4092	NON-ANTIGEN
109	A0A087SQP7	A0A087SQP7_AUXPR	F751_5162	Ornithine aminotransferase, mitochondrial	0	1			0.987859	0.340893			-0.987859	0.389283			A0A087SQP7;E1ZBH3	6.02	45.275	419	-0.075179	E	Amino acid transport and metabolism	0.4468	NON-ANTIGEN
111	A0A087SQS4	A0A087SQS4_AUXPR	F751_5189	Threonine synthase, chloroplastic	0.645754	0.296665			0	1			0.645754	0.296665			A0A087SQS4;E1ZCK4	7.74	54.735	508	-0.0360236	E	Amino acid transport and metabolism	0.4461	NON-ANTIGEN
129	A0A087STS9	A0A087STS9_AUXPR	F751_5489	Ferredoxin-dependent glutamate synthase, chloroplastic	0.359707	0.296665			0	1			0.359707	0.296665			A0A087STS9	6.12	157.037	1470	-0.122313	E	Amino acid transport and metabolism	0.5321	ANTIGEN
142	E1Z5R4	E1Z5R4_CHLVA	CHLNCDRAFT_56005	Glutamine synthetase (EC 6.3.1.2)	1.82708	0.023929	+		0	1			1.82708	0.023929	+		E1Z5R4;D2WS85	5.15	42.253	384	-0.417448	E	Amino acid transport and metabolism	0.6079	ANTIGEN
148	E1Z934	E1Z934_CHLVA	CHLNCDRAFT_142929	Phosphoserine aminotransferase (EC 2.6.1.52)	0.408656	0.296665			0	1			0.408656	0.296665			E1Z934	5.7	44.989	420	-0.10119	E	Amino acid transport and metabolism	0.4589	NON-ANTIGEN
160	E1ZE77	E1ZE77_CHLVA	CHLNCDRAFT_145342	Putative uncharacterized protein	0	1			0	1			0	1			E1ZE77;A0A087STP3	6.07	130.545	1229	-0.07738	E	Amino acid transport and metabolism	0.4892	NON-ANTIGEN
166	E1ZFZ5	E1ZFZ5_CHLVA	CHLNCDRAFT_31314	Glutamate dehydrogenase	3.11578	0.001649	+	+	0	1			3.11578	0.001649	+	+	E1ZFZ5;A0A087SET4;E1Z7M2	6.59	49.916	455	-0.121099	E	Amino acid transport and metabolism	0.3954	NON-ANTIGEN
170	E1ZGE0	E1ZGE0_CHLVA	CHLNCDRAFT_35692	Serine hydroxymethyltransferase (EC 2.1.2.1)	0.584218	0.296665			0	1			0.584218	0.296665			E1ZGE0;A0A087SH09;A0A087SRR6	9.22	48.767	452	-0.185841	E	Amino acid transport and metabolism	0.565	ANTIGEN
174	E1ZHA9	E1ZHA9_CHLVA	CHLNCDRAFT_12715	Putative uncharacterized protein (Fragment)	0.706891	0.296665			0	1			0.706891	0.296665			E1ZHA9	4.54	21.116	195	-0.170256	E	Amino acid transport and metabolism	0.6368	ANTIGEN
178	E1ZIM3	E1ZIM3_CHLVA	CHLNCDRAFT_58264	Phospho-2-dehydro-3-deoxyheptonate aldolase (EC 2.5.1.54)	0.574087	0.296665			0	1			0.574087	0.296665			E1ZIM3	6.51	56.611	511	-0.332877	E	Amino acid transport and metabolism	0.4668	NON-ANTIGEN
203	E1ZQA8	E1ZQA8_CHLVA	CHLNCDRAFT_59057	Putative uncharacterized protein	-0.650102	0.389283			-0.650102	0.340893			0	1			E1ZQA8	9.24	79.868	742	0.152965	E	Amino acid transport and metabolism	0.4876	NON-ANTIGEN
208	E1ZQX7	E1ZQX7_CHLVA	CHLNCDRAFT_27694	Cysteine synthase (EC 2.5.1.47)	0.5206	0.296665			0	1			0.5206	0.296665			E1ZQX7	5.86	35.235	335	0.0185075	E	Amino acid transport and metabolism	0.5997	ANTIGEN
217	E1ZT16	E1ZT16_CHLVA	CHLNCDRAFT_37570	Serine hydroxymethyltransferase (EC 2.1.2.1)	0.475959	0.296665			0	1			0.475959	0.296665			E1ZT16;A0A087SKJ2	9.76	57.266	521	-0.414971	E	Amino acid transport and metabolism	0.5215	ANTIGEN
91	A0A087SN66	A0A087SN66_AUXPR	F751_4440	Biotin carboxylase, chloroplastic	-0.64165	0.389283			-0.64165	0.340893			0	1			A0A087SN66;E1Z5P4	6.84	56.025	519	-0.154721	EI	Amino acid transport and metabolism, Lipid transport and metabolism	0.5354	ANTIGEN
12	A0A087SBE9	A0A087SBE9_AUXPR	F751_0437	Aminopeptidase N	0.630184	0.296665			0	1			0.630184	0.296665			A0A087SBE9	5.92	87.071	795	-0.179748	EO	Amino acid transport and metabolism, Post-translational modification, protein turnover, and chaperones	0.4526	NON-ANTIGEN
[F] Nucleotide transport and metabolism
18	A0A087SC60	A0A087SC60_AUXPR	F751_1010	Adenylate kinase B	0.654583	0.296665			0	1			0.654583	0.296665			A0A087SC60	7.9	26.395	244	-0.256557	F	Nucleotide transport and metabolism	0.5044	ANTIGEN
21	A0A087SCR4	A0A087SCR4_AUXPR	F751_4400	Adenine phosphoribosyltransferase 1	0	1			0.414735	0.340893			-0.414735	0.389283			A0A087SCR4	5.31	19.775	184	0.302717	F	Nucleotide transport and metabolism	0.3693	NON-ANTIGEN
100	A0A087SPA9	A0A087SPA9_AUXPR	F751_4142	Carbamoyl-phosphate synthase large chain	4.55643	4.4772e-14	+	+	1.13038	0.145175			3.42605	0.00193274	+	+	A0A087SPA9	5.04	126.291	1174	-0.0578365	F	Nucleotide transport and metabolism	0.3773	NON-ANTIGEN
102	A0A087SPN7	A0A087SPN7_AUXPR	F751_5655	UMP-CMP kinase	0.537071	0.296665			0	1			0.537071	0.296665			A0A087SPN7	7.19	20.459	186	-0.34086	F	Nucleotide transport and metabolism	0.5586	ANTIGEN
123	A0A087SSF2	A0A087SSF2_AUXPR	F751_3486	Nucleoside diphosphate kinase 1	-2.0062	0.267918			-4.48461	0.000538911	+	+	2.47841	0.105902			A0A087SSF2	6.26	16.102	147	0.0129252	F	Nucleotide transport and metabolism	0.4591	NON-ANTIGEN
126	A0A087STB4	A0A087STB4_AUXPR	F751_6487	Uridine 5'-monophosphate synthase	0.474039	0.296665			0	1			0.474039	0.296665			A0A087STB4;E1ZIA2	6.35	47.516	449	0.161915	F	Nucleotide transport and metabolism	0.4	NON-ANTIGEN
199	E1ZPY4	E1ZPY4_CHLVA	CHLNCDRAFT_139286	CTP synthase (EC 6.3.4.2) (UTP--ammonia ligase)	0.600565	0.296665			0	1			0.600565	0.296665			E1ZPY4	6.55	64.997	598	-0.0655518	F	Nucleotide transport and metabolism	0.4312	NON-ANTIGEN
200	E1ZPY8	E1ZPY8_CHLVA	CHLNCDRAFT_49120	Putative uncharacterized protein	0.677419	0.296665			0	1			0.677419	0.296665			E1ZPY8	4.56	113.228	1040	-0.136827	F	Nucleotide transport and metabolism	0.4009	NON-ANTIGEN
223	E1ZTF6	E1ZTF6_CHLVA	CHLNCDRAFT_141713	UMP-CMP kinase (EC 2.7.4.14) (Deoxycytidylate kinase) (Uridine monophosphate/cytidine monophosphate kinase)	0.0341476	0.296665			0	1			0.0341476	0.296665			E1ZTF6	6.8	24.37	222	-0.277477	F	Nucleotide transport and metabolism	0.5693	ANTIGEN
[G] Carbohydrate transport and metabolism
2	A0A087S9L8	A0A087S9L8_AUXPR	F751_0169	Enolase	-3.71882	0.0188132	+		1.71302	0.176149			-5.43184	2.83538e-18	+	+	A0A087S9L8	4.76	64.026	595	-0.0305882	G	Carbohydrate transport and metabolism	0.4556	NON-ANTIGEN
15	A0A087SBQ6	A0A087SBQ6_AUXPR	F751_3351	Glyceraldehyde-3-phosphate dehydrogenase, cytosolic	0	1			6.82448	1.21419e-15	+	+	-6.82448	5.28066e-14	+	+	A0A087SBQ6;E1ZKK0	4.92	70.325	688	0.0890988	G	Carbohydrate transport and metabolism	0.5996	ANTIGEN
38	A0A087SEZ7	A0A087SEZ7_AUXPR	F751_5143	2,3-bisphosphoglycerate-independent phosphoglycerate mutase	0.335961	0.296665			0	1			0.335961	0.296665			A0A087SEZ7;E1ZKF8	5.98	64.102	585	-0.386838	G	Carbohydrate transport and metabolism	0.5463	ANTIGEN
47	A0A087SG29	A0A087SG29_AUXPR	F751_2400	Glucose-6-phosphate isomerase (EC 5.3.1.9)	-3.19721	0.0221379	+		-5.29074	1.8745e-16	+	+	2.09353	0.103905			A0A087SG29;E1ZJE0;E1Z520	6.99	69.895	630	-0.19619	G	Carbohydrate transport and metabolism	0.4979	NON-ANTIGEN
57	A0A087SHX3	A0A087SHX3_AUXPR	F751_0865	Phosphomannomutase (EC 5.4.2.8)	0.776459	0.296665			0	1			0.776459	0.296665			A0A087SHX3	5.02	25.668	228	-0.130263	G	Carbohydrate transport and metabolism	0.1503	NON-ANTIGEN
64	A0A087SIW7	A0A087SIW7_AUXPR	F751_2513	Triosephosphate isomerase, cytosolic	-1.08315	0.389283			-1.08315	0.340893			0	1			A0A087SIW7	5.19	26.069	243	-0.0378601	G	Carbohydrate transport and metabolism	0.4296	NON-ANTIGEN
79	A0A087SKC3	A0A087SKC3_AUXPR	F751_4670	Phosphoglucomutase, chloroplastic	0	1			0.399384	0.340893			-0.399384	0.389283			A0A087SKC3	4.92	61.192	565	-0.190265	G	Carbohydrate transport and metabolism	0.4974	NON-ANTIGEN
89	A0A087SN43	A0A087SN43_AUXPR	F751_1320	6-phosphogluconate dehydrogenase, decarboxylating (EC 1.1.1.44)	4.50082	2.11484e-09	+	+	0.677687	0.340893			3.82314	0.000796822	+	+	A0A087SN43;E1Z9G1	5.72	50.971	473	-0.139958	G	Carbohydrate transport and metabolism	0.4936	NON-ANTIGEN
125	A0A087ST26	A0A087ST26_AUXPR	F751_4355	Phosphoglycerate kinase (EC 2.7.2.3)	0	1			5.54045	1.20267e-14	+	+	-5.54045	4.15753e-13	+	+	A0A087ST26;E1Z453;A0A087SDN5	4.7	91.426	865	-0.249249	G	Carbohydrate transport and metabolism	0.5988	ANTIGEN
139	E1Z5A0	E1Z5A0_CHLVA	CHLNCDRAFT_29609	Phosphoglycerate kinase (EC 2.7.2.3)	1.07241	0.420616			-0.719457	0.340893			1.79187	0.104094			E1Z5A0	5.34	42.111	402	0.0701493	G	Carbohydrate transport and metabolism	0.4653	NON-ANTIGEN
151	E1ZAL9	E1ZAL9_CHLVA	CHLNCDRAFT_34919	Putative uncharacterized protein	-0.501128	0.389283			-0.501128	0.340893			0	1			E1ZAL9	7.66	37.806	335	-0.545672	G	Carbohydrate transport and metabolism	0.5052	ANTIGEN
155	E1ZD04	E1ZD04_CHLVA	CHLNCDRAFT_57594	Putative uncharacterized protein	0.573166	0.296665			0	1			0.573166	0.296665			E1ZD04	5.76	55.544	507	-0.200394	G	Carbohydrate transport and metabolism	0.472	NON-ANTIGEN
162	E1ZEX2	E1ZEX2_CHLVA	CHLNCDRAFT_134063	Putative uncharacterized protein (Fragment)	0.516113	0.296665			0	1			0.516113	0.296665			E1ZEX2	8.24	10.522	99	0.126263	G	Carbohydrate transport and metabolism	0.4885	NON-ANTIGEN
187	E1ZKM6	E1ZKM6_CHLVA	CHLNCDRAFT_56257	Putative uncharacterized protein	0.279661	0.296665			0	1			0.279661	0.296665			E1ZKM6;A0A087SNY0	5.21	32.113	294	-0.215306	G	Carbohydrate transport and metabolism	0.4134	NON-ANTIGEN
221	E1ZTB0	E1ZTB0_CHLVA	CHLNCDRAFT_59826	Fructose-bisphosphate aldolase (EC 4.1.2.13)	8.2665	9.87283e-16	+	+	8.84756	4.39688e-19	+	+	-0.581056	8.53097e-05	+	+	E1ZTB0;A0A087SCK3	6.68	38.431	359	-0.109192	G	Carbohydrate transport and metabolism	0.5184	ANTIGEN
[H] Coenzyme transport and metabolism
7	A0A087SAQ1	A0A087SAQ1_AUXPR	F751_2996	2-dehydro-3-deoxyphosphooctonate aldolase 1	0.45786	0.296665			0	1			0.45786	0.296665			A0A087SAQ1	6.66	33.934	311	0.0337621	H	Coenzyme transport and metabolism	0.4233	NON-ANTIGEN
27	A0A087SDB1	A0A087SDB1_AUXPR	F751_0929	Uncharacterized protein	-1.1383	0.186782			-1.1383	0.145231			0	1			A0A087SDB1	5.68	51.616	468	-0.220513	H	Coenzyme transport and metabolism	0.4774	NON-ANTIGEN
39	A0A087SF19	A0A087SF19_AUXPR	F751_3041	Adenosylhomocysteinase (EC 3.3.1.1)	1.7195	0.0291653	+		-2.4314	0.0108496	+	+	4.15089	3.79698e-05	+	+	A0A087SF19;E1ZSI5	5.96	58.355	537	0.0320298	H	Coenzyme transport and metabolism	0.4571	NON-ANTIGEN
40	A0A087SF30	A0A087SF30_AUXPR	F751_3052	S-adenosylmethionine synthase (EC 2.5.1.6)	0.27606	0.198347			-1.34027	0.126589			1.61633	0.104995			A0A087SF30	6.02	42.926	397	-0.255668	H	Coenzyme transport and metabolism	0.685	ANTIGEN
117	A0A087SS06	A0A087SS06_AUXPR	F751_0784	Putative metal chaperone YciC	0.878844	0.296665			0	1			0.878844	0.296665			A0A087SS06	4.95	48.872	443	-0.306546	H	Coenzyme transport and metabolism	0.4963	NON-ANTIGEN
135	E1Z342	E1Z342_CHLVA	CHLNCDRAFT_55943	Putative uncharacterized protein	-1.8335	0.102125			-2.43275	0.0287429	+		0.599246	0.689368			E1Z342;A0A087SQJ2	6.41	31.504	295	0.039661	H	Coenzyme transport and metabolism	0.5322	ANTIGEN
159	E1ZE06	E1ZE06_CHLVA	CHLNCDRAFT_145246	S-adenosylmethionine synthase (EC 2.5.1.6)	0.670275	0.296665			0	1			0.670275	0.296665			E1ZE06	6.19	42.551	393	-0.256489	H	Coenzyme transport and metabolism	0.607	ANTIGEN
185	E1ZK53	E1ZK53_CHLVA	CHLNCDRAFT_136333	Putative uncharacterized protein	-1.00909	0.389283			-1.00909	0.340893			0	1			E1ZK53	6	46.741	431	-0.388399	H	Coenzyme transport and metabolism	0.4013	NON-ANTIGEN
188	E1ZKZ7	E1ZKZ7_CHLVA	CHLNCDRAFT_25699	Putative uncharacterized protein GPP1	-0.607105	0.389283			-0.607105	0.340893			0	1			E1ZKZ7	4.81	24.863	228	-0.0109649	H	Coenzyme transport and metabolism	0.482	NON-ANTIGEN
[I] Lipid transport and metabolism
59	A0A087SI38	A0A087SI38_AUXPR	F751_3002	Acetyl-coenzyme A synthetase	0	1			4.60804	0.000553969	+	+	-4.60804	0.00148046	+	+	A0A087SI38	6.21	72.837	661	-0.21407	I	Lipid transport and metabolism	0.372	NON-ANTIGEN
191	E1ZLA8	E1ZLA8_CHLVA	CHLNCDRAFT_32259	Acetyl-coenzyme A synthetase (EC 6.2.1.1)	-6.80032	6.01658e-12	+	+	-6.80032	2.34384e-13	+	+	0	1			E1ZLA8;E1ZSG1;E1ZLE1	6.21	73.533	661	-0.2882	I	Lipid transport and metabolism	0.4062	NON-ANTIGEN
58	A0A087SI33	A0A087SI33_AUXPR	F751_6045	3-oxoacyl-[acyl-carrier-protein] synthase	0.816285	0.296665			0	1			0.816285	0.296665			A0A087SI33	6.84	47.366	446	-0.0565022	IQ	Lipid transport and metabolism, Secondary metabolites biosynthesis, transport, and catabolism	0.4376	NON-ANTIGEN
[P] Inorganic ion transport and metabolism
30	A0A087SDZ5	A0A087SDZ5_AUXPR	F751_6917	Plasma membrane ATPase (EC 3.6.3.6)	0.66226	0.296665			0	1			0.66226	0.296665			A0A087SDZ5	6.6	86.767	798	0.225313	P	Inorganic ion transport and metabolism	0.4368	NON-ANTIGEN
31	A0A087SDZ6	A0A087SDZ6_AUXPR	F751_6918	Plasma membrane ATPase	-0.472053	0.389283			-0.472053	0.340893			0	1			A0A087SDZ6	4.45	26.043	243	0.22963	P	Inorganic ion transport and metabolism	0.7585	ANTIGEN
104	A0A087SPX4	A0A087SPX4_AUXPR	F751_2769	Sulfite reductase [ferredoxin]	0.426363	0.296665			0	1			0.426363	0.296665			A0A087SPX4	9.02	67.885	623	-0.242215	P	Inorganic ion transport and metabolism	0.5888	ANTIGEN
[Q] Secondary metabolites biosynthesis, transport, and catabolism
29	A0A087SDP2	A0A087SDP2_AUXPR	F751_6814	Multidrug resistance-associated protein 1	-0.570884	0.389283			-0.570884	0.340893			0	1			A0A087SDP2	7.63	143.754	1344	0.288244	Q	Secondary metabolites biosynthesis, transport, and catabolism	0.5438	ANTIGEN
41	A0A087SF75	A0A087SF75_AUXPR	F751_3097	ABC transporter I family member 11, chloroplastic	2.99116	0.0247148	+		0	1			2.99116	0.0247148	+		A0A087SF75	10.89	34.986	334	-0.0461078	Q	Secondary metabolites biosynthesis, transport, and catabolism	0.4403	NON-ANTIGEN
87	A0A087SMA7	A0A087SMA7_AUXPR	F751_4922	Uncharacterized protein	0.419293	0.296665			0	1			0.419293	0.296665			A0A087SMA7;E1ZU10	5.7	13.616	122	-0.594262	Q	Secondary metabolites biosynthesis, transport, and catabolism	0.3974	NON-ANTIGEN
163	E1ZFC8	E1ZFC8_CHLVA	CHLNCDRAFT_35414	Putative uncharacterized protein	0.285189	0.296665			0	1			0.285189	0.296665			E1ZFC8	6.21	101.451	919	-0.145811	Q	Secondary metabolites biosynthesis, transport, and catabolism	0.4234	NON-ANTIGEN
225	E1ZUF9	E1ZUF9_CHLVA	CHLNCDRAFT_138516	Putative uncharacterized protein	1.05234	0.296665			0	1			1.05234	0.296665			E1ZUF9	8.53	10.54	100	-0.209	Q	Secondary metabolites biosynthesis, transport, and catabolism	0.4856	NON-ANTIGEN
POORLY CHARACTERIZED
[S] Function unknown
8	A0A087SAU5	A0A087SAU5_AUXPR	F751_5558	Uncharacterized protein	-0.469407	0.389283			-0.469407	0.340893			0	1			A0A087SAU5	9.97	20	184	0.0271739	S	Function unknown	0.5064	ANTIGEN
14	A0A087SBQ3	A0A087SBQ3_AUXPR	F751_3348	Uncharacterized protein	-0.472893	0.389283			-0.472893	0.340893			0	1			A0A087SBQ3	5.18	62.639	600	-0.426	S	Function unknown	0.5998	ANTIGEN
137	E1Z420	E1Z420_CHLVA	CHLNCDRAFT_49788	Putative uncharacterized protein	0.595157	0.296665			0	1			0.595157	0.296665			E1Z420	7.88	95.06	892	-0.672197	S	Function unknown	0.7457	ANTIGEN
161	E1ZEG6	E1ZEG6_CHLVA	CHLNCDRAFT_17459	Putative uncharacterized protein (Fragment)	-0.87563	0.389283			-0.87563	0.340893			0	1			E1ZEG6	6.6	23.085	205	-0.127317	S	Function unknown	0.5099	ANTIGEN
165	E1ZFZ2	E1ZFZ2_CHLVA	CHLNCDRAFT_134428	Putative uncharacterized protein	0.635715	0.296665			0	1			0.635715	0.296665			E1ZFZ2	7.86	41.772	391	-0.138107	S	Function unknown	0.56	ANTIGEN
171	E1ZGX1	E1ZGX1_CHLVA	CHLNCDRAFT_134838	Putative uncharacterized protein	0.782515	0.296665			0	1			0.782515	0.296665			E1ZGX1;A0A087SEI1	9.98	19.447	177	-0.177966	S	Function unknown	0.5039	ANTIGEN
177	E1ZIK9	E1ZIK9_CHLVA	CHLNCDRAFT_135614	Putative uncharacterized protein	-0.652307	0.389283			-0.652307	0.340893			0	1			E1ZIK9	7.58	32.972	292	0.117466	S	Function unknown	0.5738	ANTIGEN
205	E1ZQI1	E1ZQI1_CHLVA	CHLNCDRAFT_139600	Putative uncharacterized protein	0	1			0.519225	0.340893			-0.519225	0.389283			E1ZQI1	7.51	170.859	1621	-0.447502	S	Function unknown	0.6756	ANTIGEN
220	E1ZT71	E1ZT71_CHLVA	CHLNCDRAFT_141626	Putative uncharacterized protein	0.692953	0.296665			0	1			0.692953	0.296665			E1ZT71	9.6	10.311	90	-0.481111	S	Function unknown	0.5002	ANTIGEN
No Ortholog found
56	A0A087SHV8	A0A087SHV8_AUXPR	F751_3992	Uncharacterized protein	-0.697677	0.389283			-0.697677	0.340893			0	1			A0A087SHV8	7.57	22.29	206	0.0038835		NO orthologs found	0.5064	ANTIGEN
101	A0A087SPK7	A0A087SPK7_AUXPR	F751_5625	Uncharacterized protein	0.696197	0.296665			0	1			0.696197	0.296665			A0A087SPK7	11.87	15.006	142	-0.592254		NO orthologs found	0.6909	ANTIGEN
132	E1Z2F4	E1Z2F4_CHLVA	CHLNCDRAFT_133132	Putative uncharacterized protein	0	1			0	1			0	1			E1Z2F4	4.96	106.354	1036	-0.503282		NO orthologs found	0.6581	ANTIGEN
Quary too large
134	E1Z2U9	E1Z2U9_CHLVA	CHLNCDRAFT_133319	Putative uncharacterized protein	-0.408211	0.389283			-0.408211	0.340893			0	1			E1Z2U9	8.45	255.209	2457	-0.390924		Query sequence too large	0.6845	ANTIGEN
136	E1Z360	E1Z360_CHLVA	CHLNCDRAFT_33619	Putative uncharacterized protein	-0.358616	0.389283			-0.358616	0.340893			0	1			E1Z360	6.57	233.463	2154	-0.211746		Query sequence too large	0.4995	NON-ANTIGEN
108	A0A087SQC7	A0A087SQC7_AUXPR	F751_5267	Triosephosphate isomerase, chloroplastic	-0.465987	0.389283			-0.465987	0.340893			0	1			A0A087SQC7	5.36	222.927	2123	-0.0260009		Query sequence too large	0.5169	ANTIGEN
204	E1ZQB3	E1ZQB3_CHLVA	CHLNCDRAFT_139515	Putative uncharacterized protein	1.08055	0.296665			0	1			1.08055	0.296665			E1ZQB3	7.21	244.597	2395	-0.147683		Query sequence too large	0.7046	ANTIGEN
